# Supplementary material for: Cancer Stem Cells and Somatic Stem Cells as Potential New Drug Targets, Prognosis Markers, and Therapy Efficacy Predictors in Breast Cancer Treatment
Source: MDPI journal article supplement (doi:10.3390/biomedicines9091223), 2021-09-14
Supplement: s1 [file s1]

**Table S1.** Clinical and morphological parameters of the patients included in the study.

| <b>Patients#</b> | <b>Age</b> | <b>Histological Type and Grade</b>                                                                                  | <b>Estrogen Receptor Status</b> | <b>Progesterone Receptor Status</b> | <b>HER2 Receptor Status</b> | <b>Lymph Node Metastasis Status</b> | <b>Ki67, %</b> | <b>MFS<sup>1</sup>, month</b> |
|------------------|------------|---------------------------------------------------------------------------------------------------------------------|---------------------------------|-------------------------------------|-----------------------------|-------------------------------------|----------------|-------------------------------|
| Patient#1        | 59         | Invasive carcinoma grade 2, Stage: T2N1M0                                                                           | 8                               | Negative                            | 1+                          | Negative                            | 45             | 6                             |
| Patient#2        | 54         | Invasive carcinoma grade 1, Stage: T1NxM0                                                                           | 7                               | 5                                   | 1+                          | Negative                            | 32             | 12                            |
| Patient#3        | 39         | Invasive ductal carcinoma grade 2, Stage: T2N2M0                                                                    | 7b                              | Positive                            | Negative                    | Negative                            | 35             | 2                             |
| Patient#4        | 42         | Invasive carcinoma grade 2, Stage: T2N1M0                                                                           | Negative                        | Negative                            | Negative                    | Positive                            | 65             | 20                            |
| Patient#5        | 63         | Invasive lobar duct cancer with DCIS comedie type foci, a multicentric form of tumor growth. grade 2, Stage: T2N2M0 | 8                               | 4                                   | Negative                    | Positive                            | 42             | 12                            |
| Patient#6        | 57         | Invasive carcinoma, grade 2, Stage: T2N0M0                                                                          | 8b                              | 4b                                  | 3+                          | Negative                            | 37             | 5                             |
| Patient#7        | 49         | Invasive carcinoma, grade 2, Stage: T2NxMx                                                                          | Negative                        | Negative                            | Negative                    | Negative                            | 38             | 24                            |
| Patient#8        | 60         | Invasive carcinoma, grade Luminal B, Stage: T2N1Mx                                                                  | Negative                        | Negative                            | Negative                    | Negative                            | 45             | 12                            |

|            |    |                                                      |          |          |          |          |    |    |
|------------|----|------------------------------------------------------|----------|----------|----------|----------|----|----|
| Patient#9  | 38 | Invasive carcinoma grade 2, Stage: T2N1M0            | Negative | Negative | Negative | Negative | 41 | 20 |
| Patient#10 | 42 | Invasive carcinoma grade 2, Luminal B, Stage: T2N0M0 | Negative | Negative | Negative | Positive | 62 | 10 |
| Patient#11 | 66 | Invasive carcinoma grade 2, Stage: T3N2M0            | 7        | Negative | 1+       | Negative | 35 | 24 |
| Patient#12 | 38 | Invasive carcinoma grade 2, Stage: T2N1M0            | 8        | Positive | Negative | Negative | 44 | 24 |

Abbreviations: <sup>1</sup>MFS, metastasis-free survival.
